# Supplementary material for: CXCR4-Related Increase of Circulating Human Lymphoid Progenitors after Allogeneic Hematopoietic Stem Cell Transplantation
Source: PubMed Central journal article supplement (PMC3951398; doi:10.1371/journal.pone.0091492), 2014-03-12
Supplement: pone.0091492.s003.pdf [file pone.0091492.s003.pdf]

**Table SI: Specific primer used for multiplex amplification and simplex real time PCR.**

| GENE           | Forward primer        | Reverse primer         |
|----------------|-----------------------|------------------------|
| CCR7           | CAGCCTTCCTGTGTGGTTTT  | TCCGTGACCTCATCTTGACA   |
| CCR9           | CACCCACAGACTTCACAAGC  | CTCGCAAACCTGCCTGACAT   |
| CD3 $\epsilon$ | GGCCTCTGCCTCTTATCAGTT | CCAGGATACTGAGGGCATGT   |
| CD4            | GCCTCCTGCTTTTTCAATTGG | CTGAAACCGGTGAGGACACT   |
| CD8B           | AAAGGGACTATCCACGGTGA  | CCGACGATCATGCAGAAGTA   |
| CD38           | ACCTCACATGGTGTGGTGAA  | ACCACATCACAGGCAGCTT    |
| CD44           | CGGACACCATGGACAAGTTT  | CACGTGGAATACACCTGCAA   |
| CKIT           | CATTCCCCAAACCTGAACAC  | CCTCCTTCGGTGCCTTTTA    |
| CMYB           | GACTATGATGGGCTGCTTCC  | GCACTGCACATCTGTTCGAT   |
| CXCR4          | CAGCAGGTAGCAAAGTGACG  | ATAGTCCCCTGAGCCCATTT   |
| EBF1           | GAAGCCAACAGCGAAAAGAC  | ATGAGGCGCACGTAGAAATC   |
| GATA1          | AGAAGCGCCTGATTGTCAGT  | CGGTTACCTGGTGTAGCTT    |
| GATA3          | GTCCTGTGCGAACTGTCAGA  | CTGGATGCCTTCCTTCTTCA   |
| HES1           | CCAAGACAGCATCTGAGCA   | CCGCGAGCTATCTTTCTTCA   |
| IKAROS         | CCAATGTGCTCATGGTTCAC  | GGAATGCAGCTTGATGTGC    |
| IL7R $\alpha$  | TATCGTATGGCCCAGTCTCC  | GAATCTGGCAGTCCAGGAAA   |
| ITG $\alpha$ 4 | AACACGCTGTTCGGCTACTC  | CTTTCCGATCCTGCATCTGT   |
| LMO2           | CGGCGCCTCTACTACAAACT  | GTCTTTACCCCGCATTGTC    |
| NOTCH1         | CAACGCCTACCTCTGCTTCT  | ACTCGTAGCCATCGATCTTGTC |
| PSGL1          | GGCTGGGACCTTGTCATAA   | CCAGTAGGATCAGCAACAGGA  |
| RAG1           | CAGTCCATGGTCTGTGGAT   | CGAGTCAACATCTGCCTTCA   |
| RORC           | CAGCGCTCCAACATCTTCT   | CGAACTCCACCACGTACTION  |
| RPL27          | CCCTTGACAAAACGTGTCGT  | ACCGCAGTTTCTGGAAGAAC   |
