# Supplementary material for: CXCR4-Related Increase of Circulating Human Lymphoid Progenitors after Allogeneic Hematopoietic Stem Cell Transplantation
Source: PubMed Central journal article supplement (PMC3951398; doi:10.1371/journal.pone.0091492), 2014-03-12
Supplement: pone.0091492.s004.pdf [file pone.0091492.s004.pdf]

**Table SII: Median of relative quantity to RPL27 for each gene.**

| MEDIANE OF RELATIVE QUANTITY TO RPL27 | CD34 <sup>+</sup> lin <sup>-</sup> CD10 <sup>+</sup> CD24 <sup>-</sup> |                        |                         | CD34 <sup>+</sup> lin <sup>-</sup> CD10 <sup>-</sup> |                        |                         | CD34 <sup>-</sup>       |                         |                         |
|---------------------------------------|------------------------------------------------------------------------|------------------------|-------------------------|------------------------------------------------------|------------------------|-------------------------|-------------------------|-------------------------|-------------------------|
|                                       | Gr 0-I                                                                 | Gr II-IV               | HD                      | Gr 0-I                                               | Gr II-IV               | HD                      | Gr 0-I                  | Gr II-IV                | HD                      |
| CCR7                                  | 0,097<br>(0,000-0,581)                                                 | 0,096<br>(0,000-0,397) | 0,428<br>(0,080-2,981)  | 0,009<br>(0,003-0,083)                               | 0,009<br>(0,000-0,314) | 0,004<br>(0,000-10,635) | 0,029<br>(0,000-0,547)  | 0,046<br>(0,000-0,218)  | 0,106<br>(0,020-4,689)  |
| CCR9                                  | 0,226<br>(0,000-1,199)                                                 | 0,581<br>(0,088-2,306) | 0,521<br>(0,194-6,071)  | 0,002<br>(0,000-0,179)                               | 0,007<br>(0,000-0,176) | 0,026<br>(0,019-10,383) | 0,008<br>(0,000-0,141)  | 0,001<br>(0,000-0,006)  | 0,013<br>(0,001-0,328)  |
| CD3E                                  | 0,019<br>(0,000-0,152)                                                 | 0,010<br>(0,001-0,021) | 0,039<br>(0,000-0,552)  | 0,002<br>(0,000-0,159)                               | 0,001<br>(0,000-0,127) | 0,018<br>(0,005-0,035)  | 0,123<br>(0,001-0,881)  | 0,157<br>(0,000-0,298)  | 0,288<br>(0,002-0,823)  |
| CD4                                   | 0,004<br>(0,001-0,153)                                                 | 0,011<br>(0,003-0,016) | 0,011<br>(0,000-0,059)  | 0,009<br>(0,001-0,594)                               | 0,002<br>(0,000-0,582) | 0,009<br>(0,007-0,020)  | 0,057<br>(0,002-0,517)  | 0,123<br>(0,046-4,309)  | 0,304<br>(0,017-0,628)  |
| CD8B                                  | 0,322<br>(0,012-0,896)                                                 | 0,206<br>(0,011-0,788) | 0,447<br>(0,206-4,884)  | 0,200<br>(0,042-4,269)                               | 0,086<br>(0,067-0,661) | 0,354<br>(0,015-2,127)  | 0,105<br>(0,004-0,562)  | 0,096<br>(0,046-1,711)  | 0,212<br>(0,004-4,221)  |
| CD38                                  | 0,006<br>(0,000-0,231)                                                 | 0,005<br>(0,003-0,070) | 0,006<br>(0,003-0,010)  | 0,032<br>(0,003-0,419)                               | 0,048<br>(0,002-0,098) | 0,053<br>(0,003-0,064)  | 0,017<br>(0,000-0,084)  | 0,011<br>(0,004-0,068)  | 0,009<br>(0,003-0,013)  |
| CD44                                  | 1,068<br>(0,000-7,275)                                                 | 0,945<br>(0,027-1,453) | 1,951<br>(0,788-19,320) | 0,352<br>(0,101-1,330)                               | 0,691<br>(0,000-2,818) | 0,688<br>(0,138-18,317) | 0,931<br>(0,030-32,189) | 1,009<br>(0,513-16,656) | 1,840<br>(0,304-23,714) |
| CKIT                                  | 0,003<br>(0,000-0,024)                                                 | 0,007<br>(0,001-0,199) | 0,007<br>(0,000-0,022)  | 0,017<br>(0,001-1,063)                               | 0,003<br>(0,000-0,124) | 0,028<br>(0,008-0,080)  | 0,000<br>(0,000-0,014)  | 0,000<br>(0,000-0,001)  | 0,000<br>(0,000-0,003)  |
| CMYB                                  | 0,034<br>(0,000-0,317)                                                 | 0,027<br>(0,000-0,726) | 0,082<br>(0,000-0,731)  | 0,253<br>(0,064-5,990)                               | 0,162<br>(0,000-0,432) | 1,374<br>(0,000-5,169)  | 0,005<br>(0,000-0,408)  | 0,007<br>(0,000-0,083)  | 0,011<br>(0,001-0,029)  |
| CXCR4                                 | 0,270<br>(0,025-2,743)                                                 | 2,753<br>(0,751-5,295) | 2,049<br>(0,443-5,417)  | 0,168<br>(0,012-2,786)                               | 0,230<br>(0,019-0,365) | 0,610<br>(0,127-8,833)  | 2,022<br>(0,008-27,627) | 2,595<br>(1,340-6,639)  | 4,121<br>(1,830-40,796) |
| EBF1                                  | 0,003<br>(0,000-6,303)                                                 | 0,000<br>(0,000-0,001) | 0,012<br>(0,000-0,135)  | 0,000<br>(0,000-0,006)                               | 0,000<br>(0,000-0,000) | 0,000<br>(0,000-0,053)  | 0,001<br>(0,000-0,148)  | 0,001<br>(0,000-0,028)  | 0,006<br>(0,000-0,019)  |
| GATA1                                 | 0,000<br>(0,000-0,044)                                                 | 0,001<br>(0,000-0,101) | 0,001<br>(0,000-0,104)  | 0,037<br>(0,000-0,335)                               | 0,008<br>(0,000-0,075) | 0,205<br>(0,000-0,827)  | 0,006<br>(0,000-0,114)  | 0,013<br>(0,002-0,201)  | 0,002<br>(0,000-0,007)  |
| GATA3                                 | 0,000<br>(0,000-0,005)                                                 | 0,001<br>(0,001-0,007) | 0,017<br>(0,013-0,403)  | 0,003<br>(0,000-0,029)                               | 0,005<br>(0,002-0,019) | 0,039<br>(0,004-0,054)  | 0,010<br>(0,000-0,122)  | 0,023<br>(0,003-0,079)  | 0,121<br>(0,047-0,217)  |
| HES1                                  | 0,002<br>(0,000-0,030)                                                 | 0,002<br>(0,000-0,014) | 0,006<br>(0,000-0,049)  | 0,001<br>(0,000-0,005)                               | 0,002<br>(0,000-0,030) | 0,003<br>(0,000-0,015)  | 0,005<br>(0,001-0,046)  | 0,005<br>(0,000-0,021)  | 0,010<br>(0,000-0,086)  |
| IKAROS                                | 0,033<br>(0,000-0,259)                                                 | 0,019<br>(0,001-0,707) | 0,054<br>(0,008-0,266)  | 0,028<br>(0,000-0,168)                               | 0,024<br>(0,000-0,363) | 0,050<br>(0,016-0,291)  | 0,022<br>(0,000-0,909)  | 0,066<br>(0,008-0,197)  | 0,040<br>(0,000-0,130)  |
| IL7R $\alpha$                         | 0,005<br>(0,000-0,038)                                                 | 0,002<br>(0,000-0,004) | 0,038<br>(0,003-0,342)  | 0,001<br>(0,000-0,017)                               | 0,002<br>(0,001-0,024) | 0,009<br>(0,001-0,718)  | 0,020<br>(0,000-0,378)  | 0,130<br>(0,030-0,254)  | 0,432<br>(0,049-0,784)  |
| ITG $\alpha$ 4                        | 0,039<br>(0,000-0,317)                                                 | 0,102<br>(0,000-0,199) | 0,074<br>(0,000-0,494)  | 0,041<br>(0,005-0,104)                               | 0,025<br>(0,000-0,224) | 0,031<br>(0,000-1,488)  | 0,051<br>(0,002-0,199)  | 0,014<br>(0,005-0,955)  | 0,092<br>(0,000-0,694)  |
| LMO2                                  | 0,051<br>(0,007-1,046)                                                 | 0,051<br>(0,000-0,166) | 0,163<br>(0,042-6,141)  | 0,061<br>(0,009-0,354)                               | 0,130<br>(0,000-0,218) | 0,483<br>(0,141-3,715)  | 0,020<br>(0,000-0,930)  | 0,140<br>(0,000-1,097)  | 0,0470<br>(0,017-0,165) |
| NOTCH1                                | 0,101<br>(0,007-1,929)                                                 | 0,035<br>(0,000-0,654) | 0,579<br>(0,018-2,414)  | 0,037<br>(0,004-0,937)                               | 0,044<br>(0,000-0,177) | 0,130<br>(0,015-0,879)  | 0,029<br>(0,000-0,385)  | 0,272<br>(0,009-1,890)  | 0,125<br>(0,003-0,201)  |
| PSGL1                                 | 0,018<br>(0,000-0,216)                                                 | 0,017<br>(0,002-0,068) | 0,029<br>(0,000-0,121)  | 0,038<br>(0,002-0,088)                               | 0,018<br>(0,000-0,038) | 0,043<br>(0,009-0,111)  | 0,149<br>(0,001-0,858)  | 0,073<br>(0,036-0,655)  | 0,316<br>(0,033-0,918)  |
| RAG1                                  | 0,324<br>(0,002-6,099)                                                 | 0,063<br>(0,024-1,321) | 0,313<br>(0,112-6,338)  | 0,111<br>(0,034-1,075)                               | 0,127<br>(0,011-3,688) | 0,107<br>(0,000-6,130)  | 0,026<br>(0,001-1,888)  | 0,032<br>(0,006-0,108)  | 0,084<br>(0,022-1,903)  |
| RORC                                  | 0,001<br>(0,000-0,037)                                                 | 0,000<br>(0,000-0,000) | 0,007<br>(0,000-0,110)  | 0,000<br>(0,000-0,010)                               | 0,000<br>(0,000-0,001) | 0,000<br>(0,000-0,003)  | 0,000<br>(0,000-0,006)  | 0,000<br>(0,000-0,010)  | 0,002<br>(0,000-0,004)  |

Result of qRT-PCR on 11 healthy donors (HD), 15 patients without aGVHD or Grade I aGVHD (Gr 0-I) and 7 patients with severe aGVHD (Gr II-IV). Median (range) of relative quantity to RPL27 are indicated.
